# Supplementary material for: SENP3 inhibition suppresses hepatocellular carcinoma progression and improves the efficacy of anti-PD-1 immunotherapy
Source: Springer Nature journal article supplement (doi:10.1038/s41418-024-01437-9), 2025-01-04

# Uncropped original western blots

Fig.1E

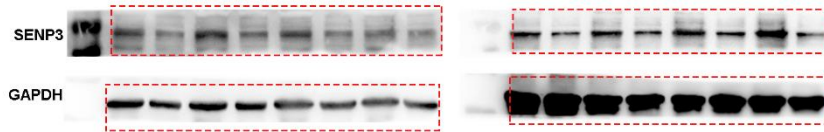

Fig.2A

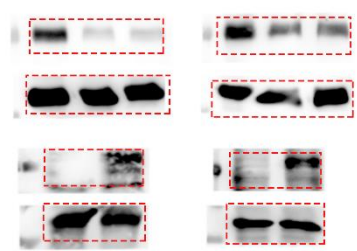

Fig.3A

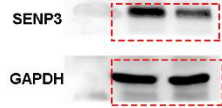

Fig.3B

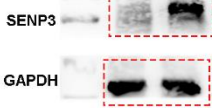

Fig.4A

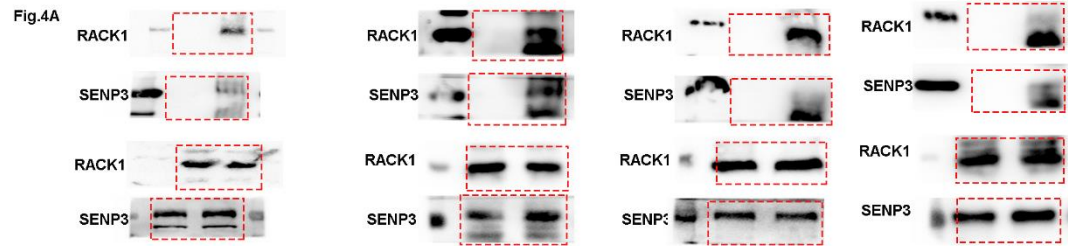

Fig.4C

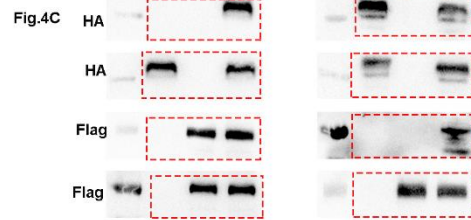

Fig.4D

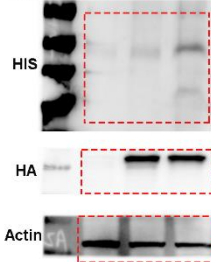

Fig.4E

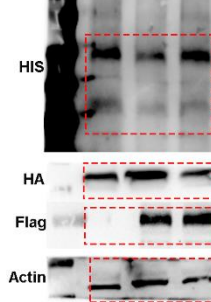

Fig.4F

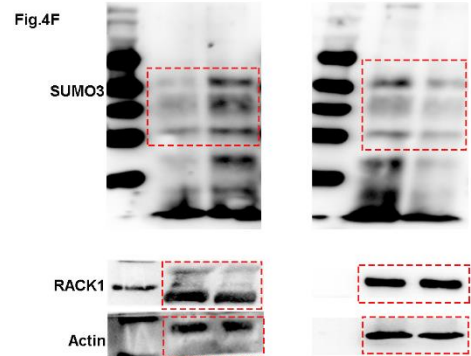

Fig.4G

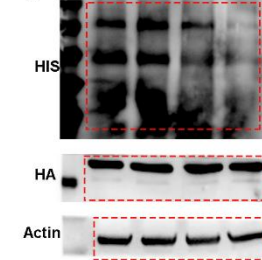

Fig.4H

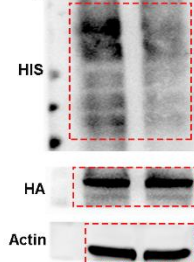

Fig.4J

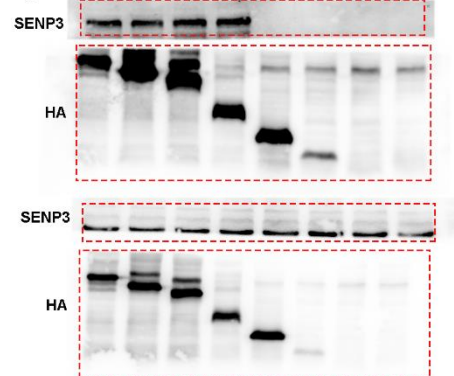

Fig.4L

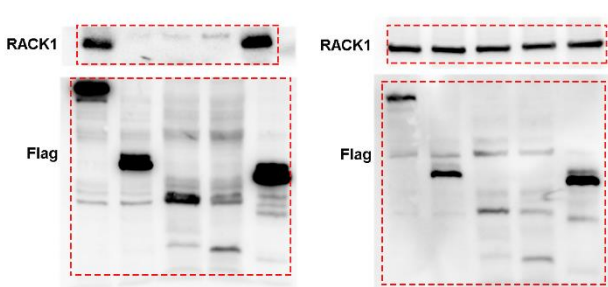

Fig.5A

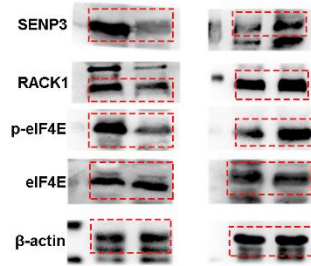

Fig.5B

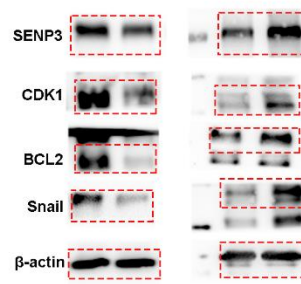

Fig.5C

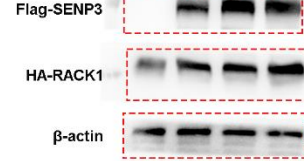

Fig.5D

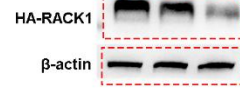

Fig.5E

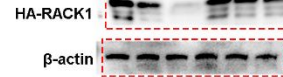

Fig.5F

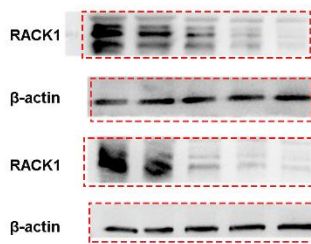

Fig.5G

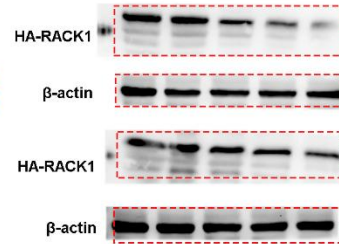

Fig.5H

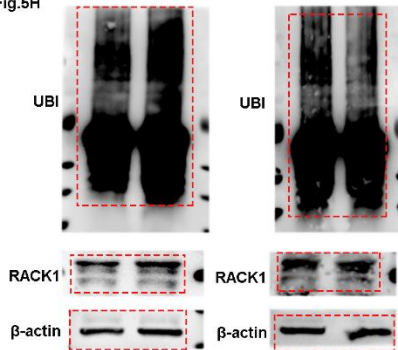

Fig.5I

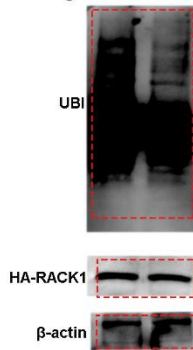

Fig.5J

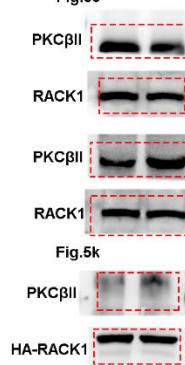

Fig.5k

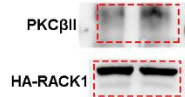

Fig.7A

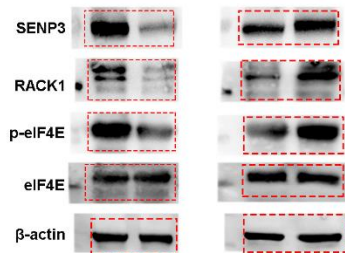

Fig.8A

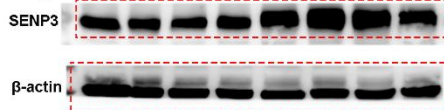

Fig.8C

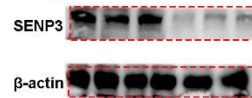

Fig.S4A

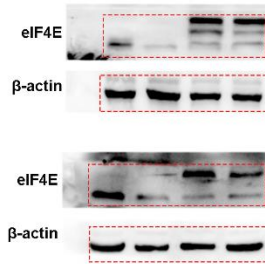

Fig.S5A

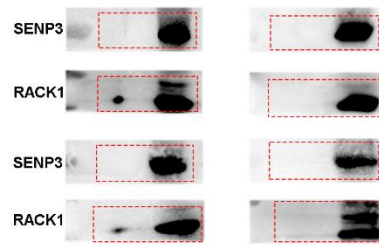

Fig.S5B

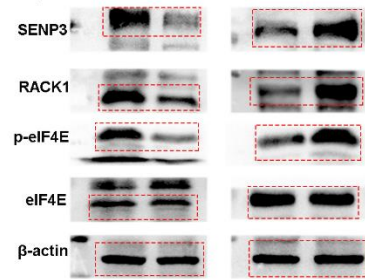

Fig.S5C

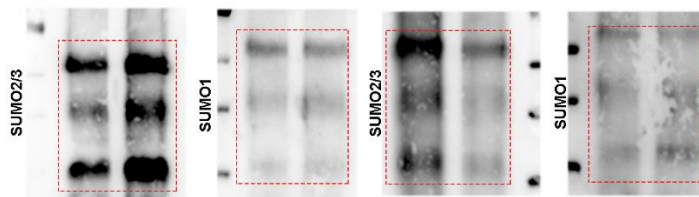

Fig.S5D

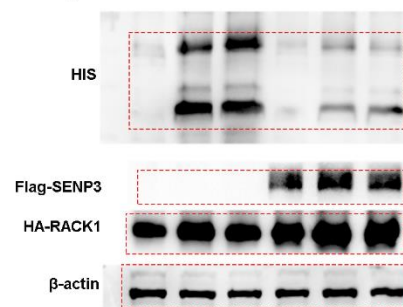

Fig.S5E

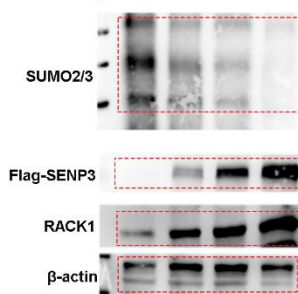

Fig.S5F

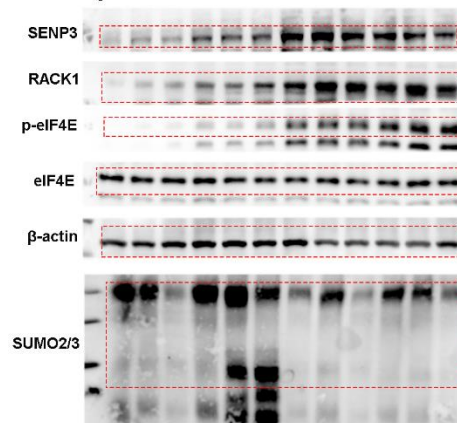

Fig.S5G

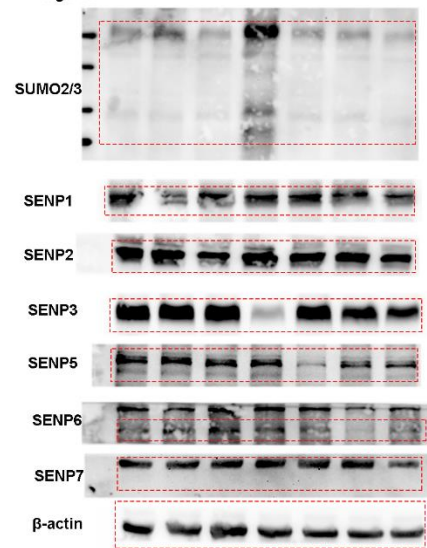

Fig.S6A

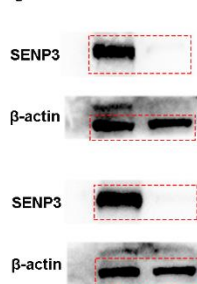

Fig.S6F

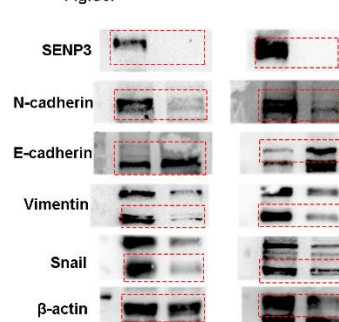

Supplement: MOESM10 [file 41418_2024_1437_MOESM10_ESM.pdf]
